# Supplementary material for: Decline in Mast Cell Density During Diffuse Alveolar Damage in Idiopathic Pulmonary Fibrosis
Source: PubMed Central journal article supplement (PMC8956519; doi:10.1007/s10753-021-01582-0), 2021-10-22
Supplement: 10753_2021_1582_MOESM1_ESM.pdf [file 10753_2021_1582_MOESM1_ESM.pdf]

## Supplementary Information

### Decline in mast cell density during diffuse alveolar damage in idiopathic pulmonary fibrosis

Johanna Salonen<sup>\*a, b</sup> (johanna.salonen@oulu.fi), Mervi Kreus<sup>a, b</sup>, Siri Lehtonen<sup>b, c</sup>, Hannu Vähänikkilä<sup>d</sup>,  
Minna Purokivi<sup>e</sup>, Riitta Kaarteenaho<sup>a, b</sup>

<sup>a</sup> Respiratory Medicine, Research Unit of Internal Medicine, University of Oulu, Oulu, Finland

<sup>b</sup> Medical Research Center (MRC) Oulu, Oulu University Hospital, Oulu, Finland

<sup>c</sup> Department of Obstetrics and Gynecology, Oulu University Hospital and PEDEGO Research Unit, University of Oulu, Oulu Finland

<sup>d</sup> Northern Finland Birth Cohorts, Arctic Biobank, Infrastructure for Population Studies, Faculty of Medicine, University of Oulu, Oulu, Finland

<sup>e</sup> The Center of Medicine and Clinical Research, Division of Respiratory Medicine, Kuopio University Hospital, Kuopio, Finland.

\*Corresponding Author

TABLE 1. Studies on mast cells in patients with idiopathic pulmonary fibrosis (IPF) compared with other interstitial lung diseases (ILD) or healthy controls.

| Study            | Material                                                                                                                                                                          | Study subjects                                                                                                                                                                                 | Staining technique for MCs | Findings                                                                                                                                                                                                                                                                                                                                  |
|------------------|-----------------------------------------------------------------------------------------------------------------------------------------------------------------------------------|------------------------------------------------------------------------------------------------------------------------------------------------------------------------------------------------|----------------------------|-------------------------------------------------------------------------------------------------------------------------------------------------------------------------------------------------------------------------------------------------------------------------------------------------------------------------------------------|
| Hunt et al 1992  | Open lung biopsy (IPF)<br>Autopsy lung specimen (control)                                                                                                                         | 15 idiopathic pulmonary fibrosis (IPF)<br>6 normal controls                                                                                                                                    | MC tryptase                | Higher number of MCs in IPF compared with controls (counted areas were directly adjacent to the lumen of bronchioles).<br>Mast cells were detected particularly in the areas of dense fibrosis.<br>Altered appearance of mast cells in IPF (irregular surfaces and degranulation).                                                        |
| Pesci et al 1993 | Transbronchial biopsies                                                                                                                                                           | 9 cryptogenic fibrosing alveolitis<br>16 sarcoidosis<br>15 farmer's lung disease<br>6 idiopathic BOOP<br>3 histiocytosis X<br>7 control subjects (non-diseased area from lung cancer patients) | Toluidine blue             | MC counts were higher in fibrotic lung disorders compared with control group.<br>The number of mast cells was positively correlated with the degree of fibrosis                                                                                                                                                                           |
| Inoue et al 1996 | Thoracoscopic biopsies<br>Transbronchial biopsies<br>Autopsy specimens<br>BAL<br>Tissue from lung allograft donors<br>Cultured human MC and human liver adenocarcinoma cell lines | 21 IPF<br>23 chronic beryllium disease (CBD)<br>8 beryllium sensitized subjects without ILD<br>10 sarcoidosis patients (Sar)<br>18 normal controls                                             | MC tryptase                | MCs were found throughout the interstitium in IPF<br>The number of MCs was higher in ILD patients compared with controls, and higher in IPF than in Sar or CBD<br>Anti-basic fibroblast growth factor (anti-bFGF) bound to MCs in the lung interstitium<br>MCs containing bFGF accumulate in the areas of extracellular matrix deposition |
| Inoue et al 2002 | Open lung biopsies<br>Fibrotic lung tissue from ILD patients having undergone transplantation<br>Autopsy specimens                                                                | 14 IPF<br>9 lymphangioleiomyomatosis (LAM)<br>10 controls                                                                                                                                      | MC tryptase                | Higher number of basic fibroblast growth factor (bFGF) containing MCs in IPF and LAM compared with controls.<br>Association of MCs with a high degree of fibrosis in IPF and LAM                                                                                                                                                          |

|                      |                                                                                                                                                                                |                                                                                                                                |                                       |                                                                                                                                                                                                                                                                                                                                                  |
|----------------------|--------------------------------------------------------------------------------------------------------------------------------------------------------------------------------|--------------------------------------------------------------------------------------------------------------------------------|---------------------------------------|--------------------------------------------------------------------------------------------------------------------------------------------------------------------------------------------------------------------------------------------------------------------------------------------------------------------------------------------------|
| Hirata et al 2007    | Snap-frozen specimens:<br>Video-assisted thoracoscopic biopsies from lungs<br>One autopsy lung tissue specimen                                                                 | 7 usual interstitial pneumonia (UIP)<br>4 other ILD<br>8 normal controls                                                       | Both MC chymase and MC tryptase       | The number of MCs was higher in idiopathic interstitial pneumonias than in control specimens.<br>The chymase-positive mast cells of ILD patients' lung tissue were related to an increase in interleukin-4-positive cells and an accumulation of smooth muscle cells and myofibroblasts                                                          |
| Andersson et al 2011 | Lung tissue specimens collected in the association with lung transplantation or from open lung biopsy                                                                          | 5 Cystic fibrosis<br>7 IPF<br>8 controls (patients having undergone lung surgery for suspected cancer)                         | MC tryptase and chymase               | MC density was increased in fibrotic areas of alveolar parenchyma in IPF<br>Density and percentage of MCTC correlated positively with the degree of fibrosis<br>Increased density of MCTCs as well as MC expression of TGF- $\beta$ correlated negatively with patient lung function                                                             |
| Cha et al 2012       | Lung tissue                                                                                                                                                                    | 29 IPF<br>16 chronic hypersensitivity pneumonia (cHP)<br>9 systemic scleroderma-associated ILD (SSc-ILD)<br>10 normal controls | MC chymase                            | A higher density of MCs in IPF compared with cHP, SSc-ILD or control.<br>IPF patients with high MC density had a slower rate of decline in forced vital capacity (FVC) than other ILD patients or controls.                                                                                                                                      |
| Veerappan et al 2013 | Animal model: Bleomycin induced fibrosis in mice<br>Human fibroblasts extracted from surgical lung biopsy and BAL material                                                     | IPF (BAL and biopsies)<br>Normal controls (BAL and biopsies, surgical waste material)                                          | Toluidine blue or glycoprotein avidin | MC-deficient mice were protected from bleomycin induced fibrosis<br>Re-introduction of MCs to MC-deficient mice led to pulmonary fibrosis<br>Both human and rat lung fibroblasts expressed histamine H1 and angiotensin II AT1 receptors<br>Histamine and renin were fibrogenic in an <i>in vitro</i> model                                      |
| Wygrecka et al 2013  | Lung tissue specimens from resected lungs of transplanted IPF patients<br>Bronchoalveolar lavage fluid (BAL)<br>In vitro cell cultures of human lung fibroblasts (HLF) and MCs | IPF (40 BAL and 24 lung tissue)<br>Normal controls (20 BAL and 10 non-used donor lungs)                                        | MC tryptase                           | Elevated number of MCs in IPF compared with control subjects.<br>The majority of MCs in IPF lungs were activated.<br>HLFs induced MC activation and proliferation in vitro.<br>IPF patients' HLFs exhibited a higher growth rate compared with controls<br>Tryptase stimulated HLF growth and promoted extracellular matrix production in vitro. |

|                         |                                                                                                                                        |                                                                                                                                                                                                                                                                                        |                                                                         |                                                                                                                                                                                                                                                                                                                                                                                                                                          |
|-------------------------|----------------------------------------------------------------------------------------------------------------------------------------|----------------------------------------------------------------------------------------------------------------------------------------------------------------------------------------------------------------------------------------------------------------------------------------|-------------------------------------------------------------------------|------------------------------------------------------------------------------------------------------------------------------------------------------------------------------------------------------------------------------------------------------------------------------------------------------------------------------------------------------------------------------------------------------------------------------------------|
| Shimbori et al 2019     | Lung tissue<br>Animal model: TGF-β1 or bleomycin induced pulmonary fibrosis in rats or mice                                            | IPF<br>Normal lung tissue from patients having undergone surgery for lung cancer                                                                                                                                                                                                       | Toluidine blue<br>Immunofluorescence stainings for tryptase and chymase | MC number was increased in IPF<br>MC number correlated inversely with lung function (forced vital capacity, all stainings)<br>MCs accumulated in fibrotic lung (animal model)<br>MCs on fibrotic extracellular matrix (ECM) produced more TGF-β compared with normal ECM (animal model)<br>Mechanical stretch of lungs caused mast cell degranulation                                                                                    |
| Overed-Sayer et al 2020 | Lung biopsy material<br>Cell cultures with cord blood-derived MCs and normal human lung fibroblasts<br>Rats with bleomycin induced ILD | MC quantification and phenotyping:<br>17 IPF<br>9 chronic HP (cHP)<br>9 non-specific interstitial pneumonia (NSIP)<br>20 normal lung tissue from patients with lung cancer<br>MC protease signature analysis:<br>10 IPF lung volume reduction patients<br>9 normal lung tissue samples | MC tryptase and chymase                                                 | MCs were elevated in IPF and cHP lung, but not in NSIP<br>MCs correlated negatively with baseline FVC<br>MCs correlated positively with fibroblast foci<br>MC signature was increased in IPF lung<br>MCs induced fibroblast proliferation and activation<br>MCs and fibroblasts displayed crosstalk in co-culture studies<br>Nintedanib inhibited MC survival and activation<br>Nintedanib reduced MC recruitment in rat bleomycin model |
| Bagher et al 2021       | Cell cultures on plastic plates and decellularized human lung tissue (scaffolds)                                                       | Human lung fibroblasts from IPF patients and healthy controls                                                                                                                                                                                                                          | NA                                                                      | MCs and tryptase increased fibroblast release of mediators<br>Epithelial migration was influenced by the release of mediators                                                                                                                                                                                                                                                                                                            |

BAL, bronchoalveolar lavage; bFGF, basic fibroblast growth factor; BOOP, bronchiolitis obliterance organizing pneumonia; CBD, chronic beryllium disease; ECM, extracellular matrix; FVC, forced vital capacity; HLF, human lung fibroblast; HP, hypersensitivity pneumonia; ILD, interstitial lung disease; IPF, idiopathic pulmonary fibrosis; LAM, lymphangioliomyomatosis; MC, mast cell; MCTC, mast cells positive for both tryptase and chymase, NSIP, non-specific interstitial pneumonia; sar, sarcoidosis; Ssc-ILD, systemic scleroderma-associated ILD; TGFβ1, transforming growth factor β1; UIP, usual interstitial pneumonia

TABLE 2. Clinical characteristics of normal controls compared with IPF patients.

|                                         | IPF (N=47) | Control (N=12) | P-value |
|-----------------------------------------|------------|----------------|---------|
| Age, years                              | 62±7.7     | 71±6.0         | <0.01   |
| Male                                    | 34 (72.3)  | 2 (16.7)       | <0.01   |
| Smoking status at biopsy                |            |                | <0.01   |
| Never-smoker                            | 16 (38.1)  | 11 (91.7)      |         |
| Ex-smoker                               | 20 (47.6)  | 1 (8.3)        |         |
| Current smoker                          | 6 (14.3)   | 0              |         |
| Pack-years of ever-smokers <sup>a</sup> | 26±11      | 7              | 0.115   |
| FVC% <sup>b</sup>                       | 74±16      | 106±14         | <0.01   |
| FEV1% <sup>c</sup>                      | 79±17      | 105±15         | <0.01   |
| FEV1/FVC <sup>d</sup>                   | 86±6.0     | 78±3.4         | <0.01   |
| DLCO% <sup>e</sup>                      | 55±13      | 81±5.8         | <0.01   |

Data is presented as mean± standard deviation, median (interquartile range) and number of patients (%) when appropriate. <sup>a</sup>Data of 13 smokers or ex-smokers was missing, <sup>b</sup>Data of 9 IPF patients and 4 control patients was missing, <sup>c</sup>Data of 8 IPF patients and 4 control patients was missing, <sup>d</sup>Data of 9 IPF patients and 5 control patients was missing <sup>e</sup>Data of 10 IPF patients and 8 control patients was missing.
